# Supplementary material for: Hyaluronan-decorated polymer nanoparticles targeting the CD44 receptor for the combined photo/chemo-therapy of cancer
Source: Royal Society of Chemistry journal article supplement (doi:10.1039/c4nr06910b), 2015-01-01
Supplement: c4nr06910b1.pdf [file c4nr06910b1.pdf]

## Electronic Supplementary Information

### S1. Synthesis of PLGA-RHO

The preparation of PLGA-RHO conjugate was performed under inert nitrogen or argon atmosphere and dry conditions according to scheme 1.

The preparation of PLGA-Rhodamine conjugate was performed under inert nitrogen or argon atmosphere and dry conditions.

1. *c*-PLGA502H-N<sub>3</sub>(figure S1.1): The terminal hydroxyl group of PLGA502H was changed into azide by two-step azidation with mesyl chloride activation. After 24 hours reaction mixture was simply concentrated and precipitated in diethyl ether methanol solution 1/1 v/v obtaining a sponge like solid. Thereafter, nucleophilic substitution with sodium azide was carried out in DMF/water solution (20/1 v/v) and temperature was set at 38°C for 24 hours. Reaction mixture was dried, redissolved in CHCl<sub>3</sub>, filtered and precipitated in diethyl ether.

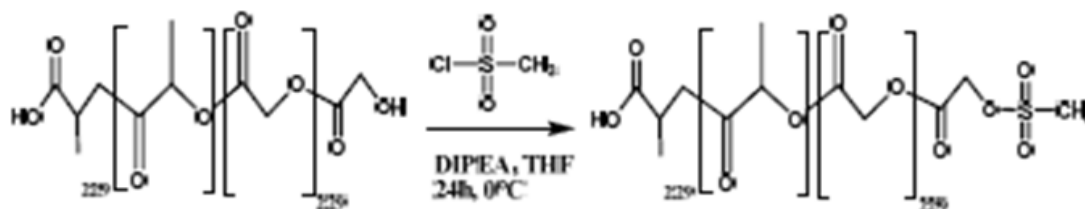

Scheme S1.1. *c*-PLGA502H-OH hydroxyl activation with mesyl chloride.

<sup>1</sup>H-NMR analysis was used to confirm product chemical structure. As illustrated in figure S1.2A, in the <sup>1</sup>H-NMR spectrum of *c*-PLGA502H-OH, α-hydroxyl methylene (d) is quite visible at 4.31 ppm and is possible to adopt this signal as diagnostic standard for further reaction. NMR spectrum of *c*-PLGA502H-mesyl (figure S1.2B) was analyzed, comparing integration values of the signals related to the protons CH<sub>3</sub>-CH- (a) (δ = 1.60) and terminal CH<sub>3</sub>-OSO (e) (δ = 3.21). The conversion degree is higher than 95%. Other evidence of quantitative reaction is total disappearance of signal at 4.31 ppm related to α-hydroxyl methylene.

The reaction grade of nucleophilic addition to give *c*-PLGA502H-N<sub>3</sub>, was evaluated comparing integrations values of the signals related to the protons CH<sub>3</sub>-CH- (a) (δ = 1.60) and terminal CH<sub>2</sub>-N<sub>3</sub> (d) (δ = 4.30) (figure S1.2C). The conversion degree of *c*-PLGA502H-mesyl, within the limits of experimental error, was higher than 95%. Other evidence of quantitative reaction is the total disappearance of signal at 3.21 ppm related to mesyl group.

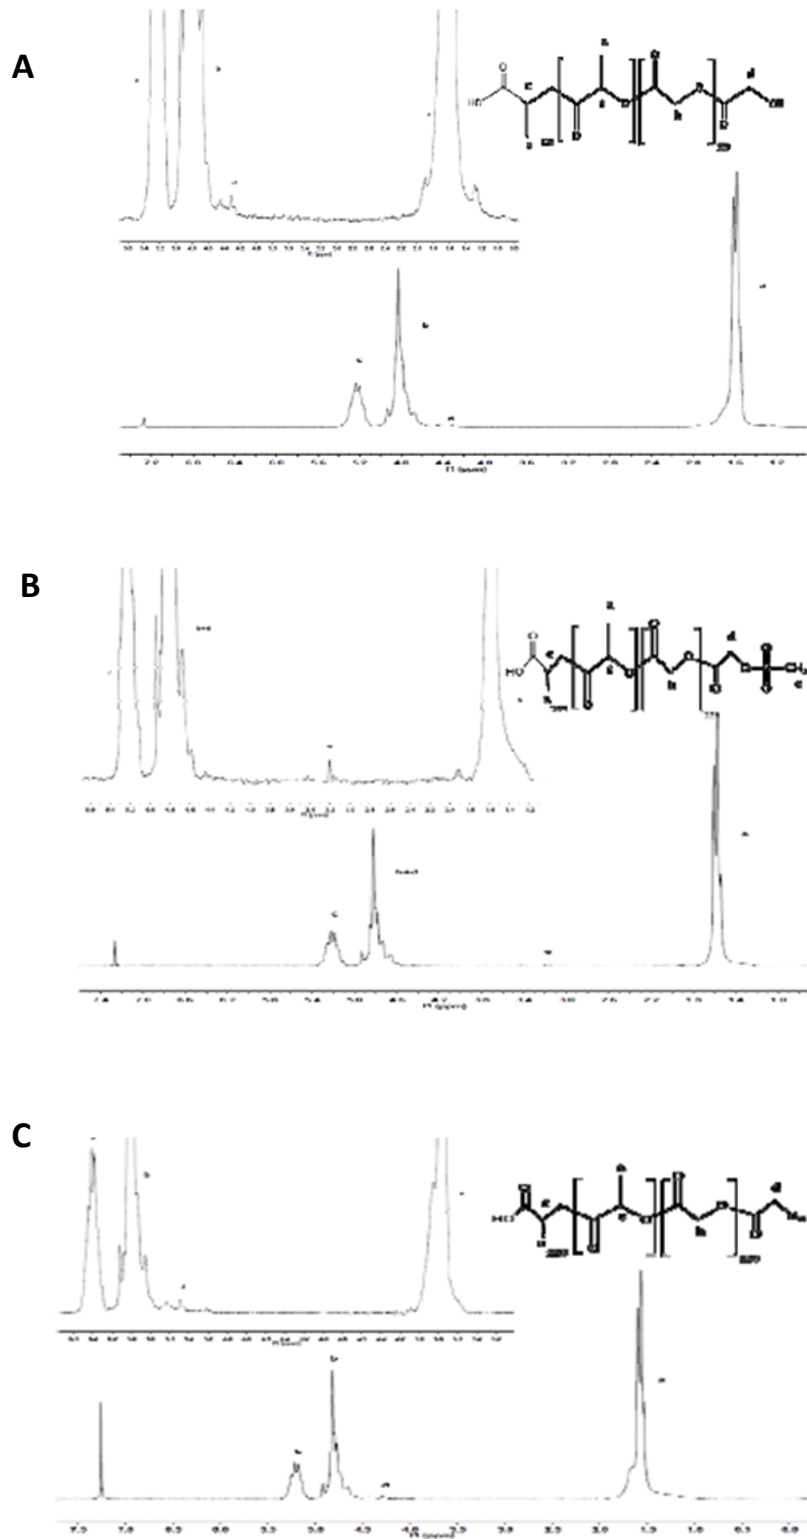

Figure S1.2.  $^1\text{H-NMR}$  of A) c-PLGA502H-OH; B) c-PLGA502H-mesyI; C) c-PLGA502H-N<sub>3</sub> with proton assignment.

Also FTIR analysis shows clearly diagnostic stretching signal of azide at 2100  $\text{cm}^{-1}$  (Figure S1.3).

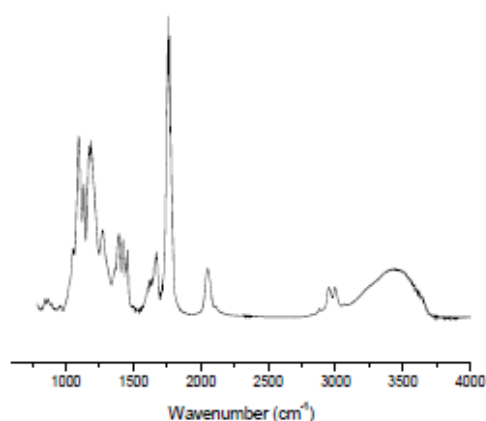

Figure S1.3. FTIR spectrum of c-PLGA502H-N<sub>3</sub>.

2. *Rhodamine coupling with c-PLGA502H-N<sub>3</sub>* (figure S1.4A): Rhodamine B was reacted with 3-Butynol in presence of DCC and DMAP to give alkyne ester. After 48 h reaction mixture was filtered from dicyclohexylurea, concentrated and purified by silica gel chromatography with  $\text{CHCl}_3$ /Methanol 9/1 v/v as eluent. Thereafter, the Huisgen cycloaddition between Rhodamine-alkyne and c-PLGA502H-N<sub>3</sub> was carried out (figure S1.4B) in 30% molar excess of Rhodamine-alkyne and cocatalyst N,N-Diisopropylethylamine (DIPEA), in 5/1 molar ratio between c-PLGA502H-N<sub>3</sub> and the catalyst  $[(\text{Ph})_3\text{P}]_3\text{CuBr}$ . After 48 h stirring at 35°C, reaction mixture was concentrated, purified by Cu(I) catalyst by neutral alumina column and precipitated in diethyl ether methanol solution 1/1 v/v.

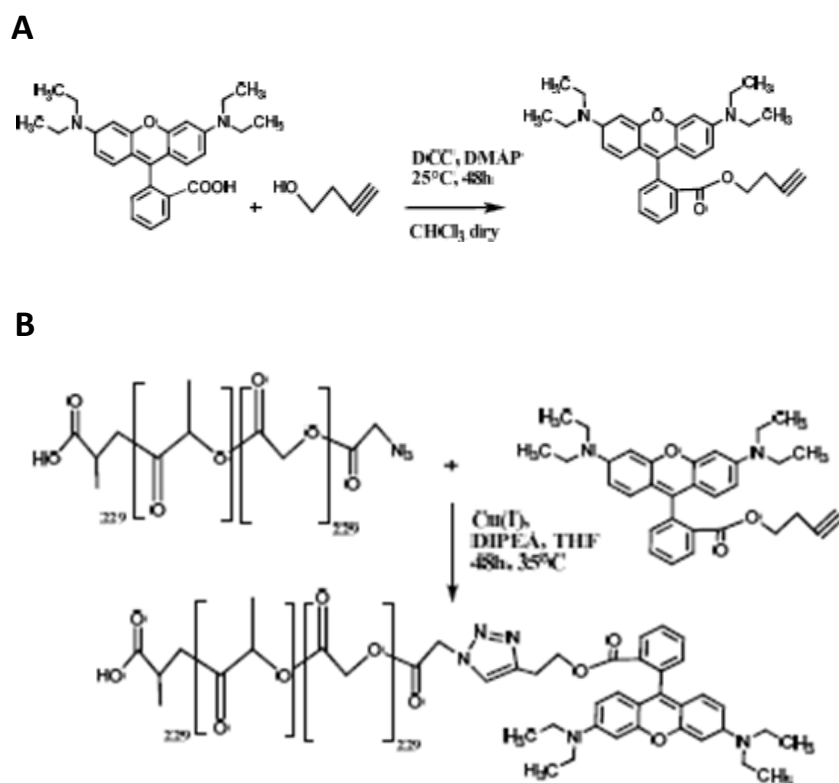

Figure S1.4. A) reaction between Rhodamine B and 3-Butynol to give Rhodamine-alkyne; B) Huisgen cycloaddition between Rhodamine-alkyne and c-PLGA502H-N<sub>3</sub> to give final fluorescent polymer (PLGA-RHO).

$^1\text{H-NMR}$  analysis was first used to confirm product chemical structure, Rhodamine-alkyne, comparing integrations values of the signals related to the protons  $\text{CH}_3\text{-CH-}$  (a) ( $\delta = 1.60$ ) and terminal  $\text{CH}_2\text{-O-CO}$  (d) ( $\delta = 4.30$ ) (figure S1.5A) was evaluated that Rhodamine B conversion degree is higher than 95%.

The reaction grade Huisgen Cycloaddition to give c-PLGA502H-Rhodamine was evaluated, comparing integrations values of the signals related to the protons  $\text{CH}_3\text{-CH-}$  (a) ( $\delta = 1.60$ ) and terminal  $\text{CH}_2\text{-O-CO}$  (n) ( $\delta = 4.20$ ) (figure S1.5B) The final c-PLGA502H- $\text{N}_3$  conversion degree is, within the limits of experimental error, higher than 95%.

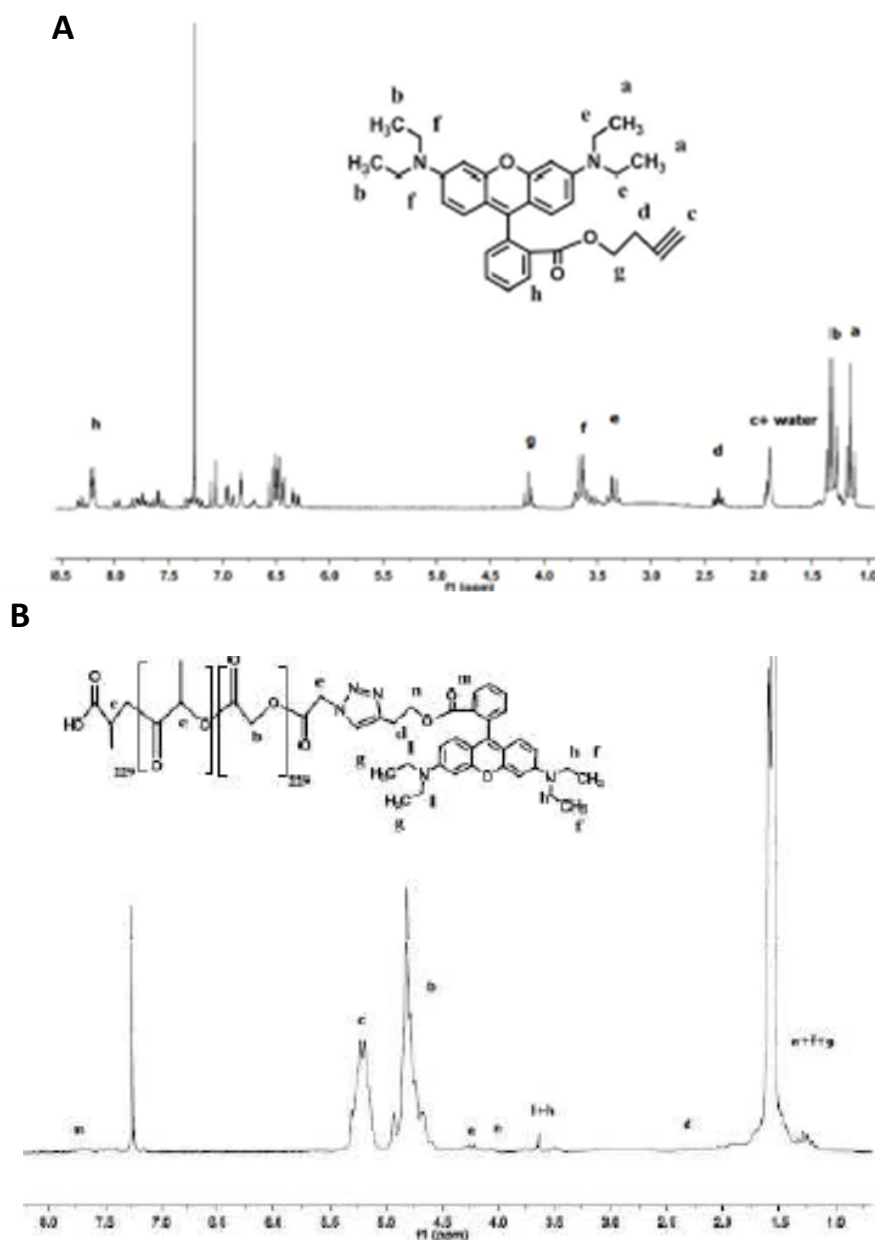

Figure S1.5.  $^1\text{H-NMR}$  of A) Rhodamine-alkyne; B) c-PLGA502H-Rhodamine with proton assignment.

FTIR confirm quantitative coupling; can be noted, in fact, complete disappearance of diagnostic stretching signal of azide at  $2100\text{ cm}^{-1}$  (Figure S1.6).

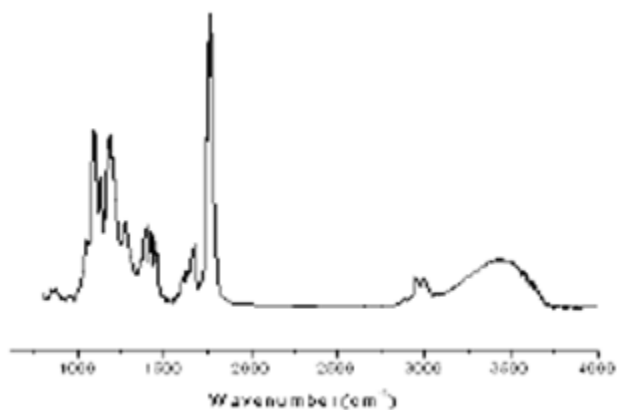

Figure S1.6. FTIR spectrum of c-PLGA502H-Rhodamine.

## S2. Stability of DTX/TPPS<sub>4</sub>-dcNPs in different media.

Freeze-dried DTX/TPPS<sub>4</sub>-dcNPs were dispersed in water, DMEM FBS- and DMEM FBS+. Hydrodynamic diameter, polydispersity index (PI) and zeta potential of NPs after each preparation step were determined on a ZetasizerNano Z (Malvern Instruments Ltd., UK). Results are reported as mean of three separate measurements of three different batches ( $n=9$ )  $\pm$  SD.

Absorption spectra of freeze-dried DTX/TPPS<sub>4</sub>-dcNPs dispersed in water was recorded on a UV 1800 (Shimadzu, Japan) using a 1 cm pathlength quartz cell.

As shown in Table S2, a slight size growth is observed in DMEM FBS- which becomes more marked in DMEM FBS+. In all the cases, no macroscopic aggregation of DTX/TPPS<sub>4</sub>-dcNPs is observed. Nevertheless, zeta potential is decreased in the media tested and remains unaltered independently of the presence of proteins.

**Table S2.** Properties of freeze-dried DTX/TPPS<sub>4</sub>-dcNPs in different media.

|           | Size<br>nm   | PI   | Zeta potential<br>mV |
|-----------|--------------|------|----------------------|
| Water     | 203 $\pm$ 10 | 0.15 | -22                  |
| DMEM FBS- | 244 $\pm$ 28 | 0.26 | -9.5                 |
| DMEM FBS+ | 328 $\pm$ 10 | 0.27 | -10.0                |

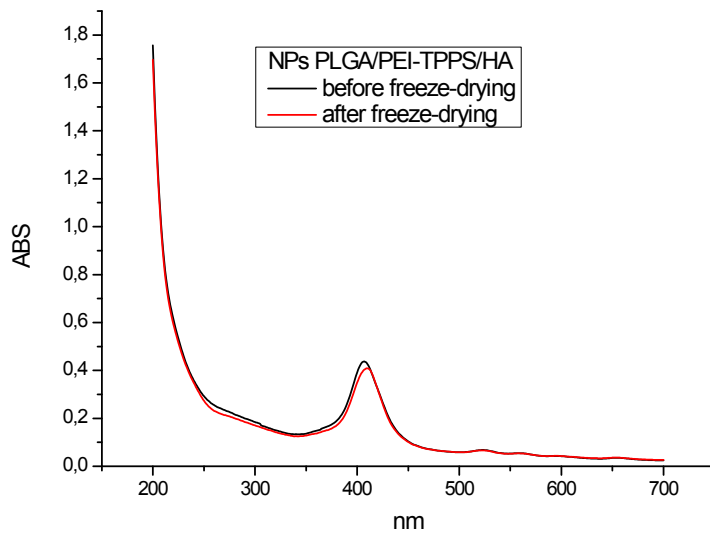

**Figure S2.** Absorption spectra of DTX/TPPS<sub>4</sub>-dcNPs in water before and after freeze-drying.

### S3. Intracellular localization of NPs

The intracellular localization of TPPS<sub>4</sub>, free and in nanoparticles (TPPS<sub>4</sub>-dcNPs) was determined by confocal microscopy. MDA-MB231 cells (6 x 10<sup>4</sup>), seeded in special tissue culture dishes for fluorescence microscopy ( $\mu$ -Dish<sup>35mm, high</sup>, Ibidi GmbH, Planegg, Germany), were allowed to grow for 24 h and then incubated for 24 h with 1  $\mu$ g/mL PS diluted in medium added with 3% FBS. Fifteen min before the end of the incubation with the PS, the cells were stained with BODIPY<sup>®</sup> FL C<sub>5</sub>-Ceramide (15  $\mu$ M) or LysoTracker<sup>®</sup> Green DND-26 (75 nM) used as markers for Golgi apparatus and lysosomes, respectively. Cells were then washed twice with PBS with Ca<sup>2+</sup> and Mg<sup>2+</sup> and immediately analyzed with a Leica SP5 confocal laser-scanning microscope (Leica Microsystems Srl, Milan, Italy); the images were elaborated with the ImageJ software.

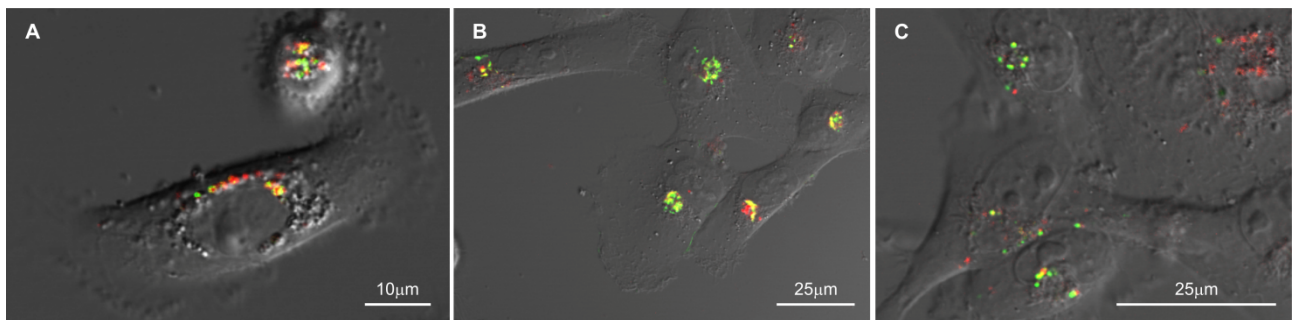

**Figure S3.** Confocal microscopy images showing the intracellular localization of TPPS<sub>4</sub>-dcNPs (A) and free TPPS<sub>4</sub> (B, C) in MDA-MB-231 cells incubated for 24 h. A and C: merged images of TPPS<sub>4</sub> and LysoTracker green; B: merged images of TPPS<sub>4</sub> and BODIPY<sup>®</sup> FL C<sub>5</sub>-ceramide.

#### S4. Cell cycle analysis

MDA-MB231 cells ( $1 \times 10^6$ ) were seeded in 100 mm culture dishes and incubated with free DTX or DTX NPs for 24 h. Treated and control cells were harvested, fixed in 70% cold ethanol and stored at 4 °C overnight. Before analysis, cells were washed in distilled water, centrifuged and resuspended in 1 mL PBS containing 50  $\mu\text{g/mL}$  propidium iodide (Sigma-Aldrich) and 100  $\mu\text{g/mL}$  RNase, for DNA staining. Samples were incubated for 1 h at 37 °C and then analyzed by flow cytometry. Data from  $2 \times 10^4$  cells/sample were acquired with the FACSDivasoftware and analyzed with the ModFit LT 3.0 software (BD Biosciences) to determine alterations in cell cycle distribution.

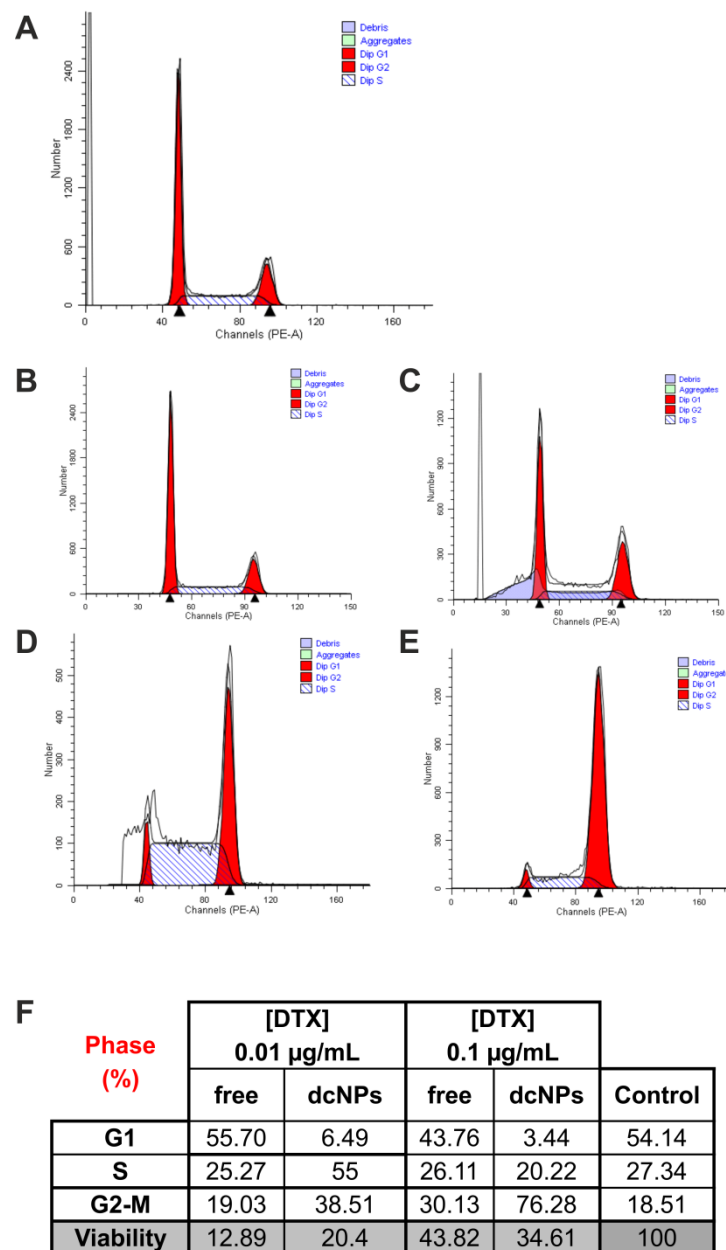

**Figure S4.** Analysis of cell cycle of MDA-MB-231 cells exposed to free DTX or DTX-dcNPs for 24 h. Control cells (A); cells exposed to free DTX at 0.01  $\mu\text{g/mL}$  (B) or 0.1  $\mu\text{g/mL}$  (D); cells exposed to DTX-dcNPs at 0.01  $\mu\text{g/mL}$  (C) or 0.1  $\mu\text{g/mL}$  (E). Percentages of cells the various phases are shown in F).



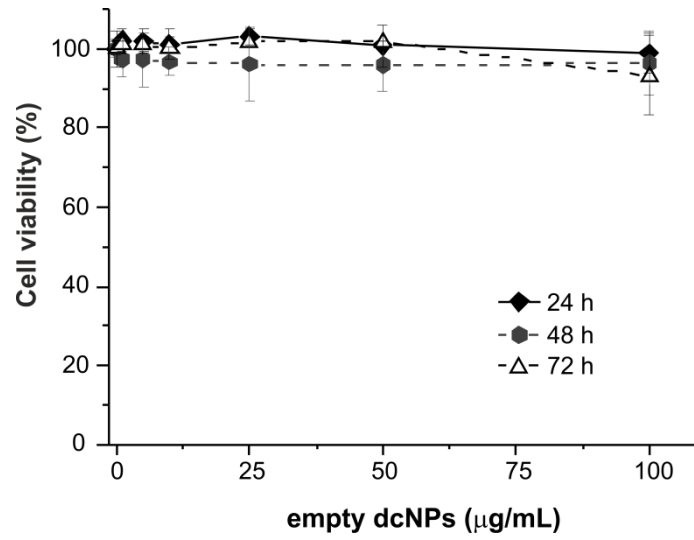

**Figure S5.** Cell viability of MDA-MB-231 cells exposed up to 72 h to increasing concentrations of empty dcNPs.

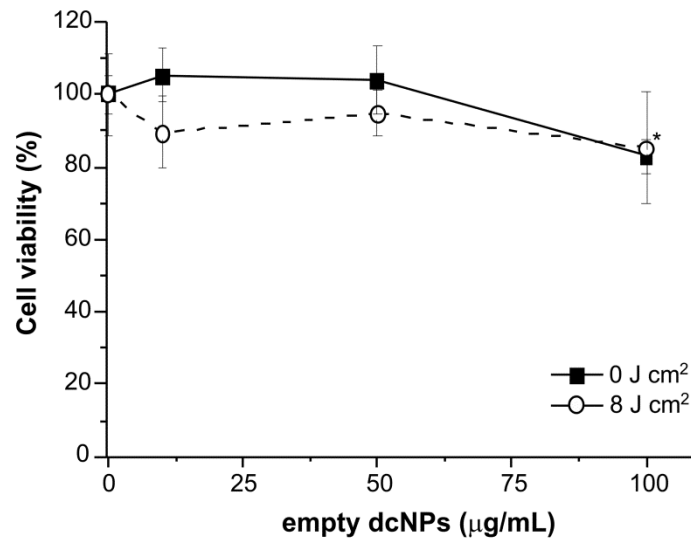

**Figure S6.** Viability of MDA-MB-231 cells exposed for 24 h to increasing concentrations of empty dcNPs and kept for additional 24 h in complete medium after being or not exposed to 8 J/cm<sup>2</sup> of blue light.
